# Supplementary material for: Life-Long Radar Tracking of Bumblebees
Source: PLoS One. 2016 Aug 4;11(8):e0160333. doi: 10.1371/journal.pone.0160333 (PMC4973990; doi:10.1371/journal.pone.0160333)
Supplement: S1 Dataset — These are the data extracted from the raw tracking files and used in the analyses in this manuscript. The data are presented in an Excel spreadsheet with one row for every flight we recorded. The columns give the following information: Bee gives the number code used to refer to the bee that made each flight; Flight no gives the order each flight was made; Date is the date on which each flight was recorded; Time is the time that the bee left the nest for each flight; Flight duration is the total duration of the flight, in seconds, from leaving to re-entering the nest; Time in flight is the time that the bee could be shown to be actually flying, in seconds; Flight distance is the total distance flown during the flight, in meters; Maximum distance is the greatest distance from the nest, in meters, reached during the flight; Digressiveness is the digressiveness score for the flight, defined as Flight distance2*Maximum distance; Exp is a code describing whether each flight was categorised as exploration (0) or exploitation (1). (XLSX) [file pone.0160333.s001.xlsx]

## Sheet: Sheet1
Bee	Flight no	Date	Time	Flight duration	Time in flight	Flight distance	Maximum distance	Digressiveness	Exp
1	1	2015-06-25	10:17:40	8282	1230	5824.71	314.714	9.25397	0
1	2	2015-06-25	12:37:29	802	486	852.696	115.614	3.68769	0
1	3	2015-06-26	10:32:58	4633	1199	2560.45	189.933	6.74041	0
1	4	2015-06-26	11:50:57	1336	93	529.791	227.04	1.16674	1
1	5	2015-06-26	12:15:23	929	32	103.761	34.9824	1.48305	1
1	6	2015-06-26	12:31:29	1468	57	257.295	107.371	1.19815	1
1	7	2015-06-26	12:56:26	871	52	458.111	222.095	1.03134	1
1	8	2015-06-26	13:11:35	1333	67	247.359	110.69	1.11735	1
1	9	2015-06-26	13:34:22	1406	49	472.644	228.189	1.03564	1
1	10	2015-06-26	13:58:22	1582	40	312.114	158.347	0.985535	1
1	11	2015-06-26	14:25:36	1532	78	512.899	240.452	1.06653	1
1	12	2015-06-26	14:51:26	1411	90	449.297	184.581	1.21708	0
1	13	2015-06-26	15:15:14	1295	46	242.477	111.474	1.08759	1
1	14	2015-06-26	15:37:27	1445	68	503.113	229.222	1.09744	1
1	15	2015-06-26	16:02:10	1440	61	332.863	142.541	1.1676	1
1	16	2015-06-26	16:26:50	1353	53	272.066	122.003	1.115	1
1	17	2015-06-26	16:49:57	1344	78	271.542	108.799	1.24791	1
1	18	2015-06-26	17:13:05	37	37	107.67	101.133	0.532317	1
1	19	2015-06-27	10:54:38	1620	89	538.833	252.84	1.06556	1
1	20	2015-06-27	11:22:42	902	73	511.902	243.092	1.0529	1
1	21	2015-06-27	11:39:31	1236	80	502.926	235.98	1.06561	1
1	22	2015-06-27	12:01:05	1315	77	520.807	252.826	1.02997	1
1	23	2015-06-27	12:23:55	1150	77	541.149	244.873	1.10496	1
1	24	2015-06-27	12:43:46	804	94	558.835	257.576	1.0848	1
1	25	2015-06-27	12:57:59	799	72	535.714	256.776	1.04315	1
1	26	2015-06-27	13:12:25	1231	63	549.246	261.591	1.04982	1
1	27	2015-06-27	13:33:36	981	73	529.206	255.478	1.03572	1
1	28	2015-06-27	13:51:00	1073	57	536.253	254.371	1.05407	1
1	29	2015-06-27	14:10:14	2067	86	587.595	276.057	1.06427	1
1	30	2015-06-27	14:45:07	1203	72	551.16	263.597	1.04546	1
1	31	2015-06-27	15:06:13	1293	65	552.136	263.877	1.0462	1
1	32	2015-06-27	15:28:38	1425	75	535.134	258.993	1.03311	1
1	33	2015-06-27	15:53:12	1198	52	520.356	252.84	1.02902	1
1	34	2015-06-27	16:13:59	1088	69	520.341	252.538	1.03022	1
1	35	2015-06-27	16:32:38	1166	57	538.536	262.47	1.0259	1
1	36	2015-06-27	16:52:59	2251	89	590.325	267.916	1.1017	1
1	37	2015-06-27	17:31:39	1013	66	502.743	240.051	1.04716	1
1	38	2015-06-27	17:48:58	1485	86	549.997	261.203	1.05282	1
1	39	2015-06-27	18:14:27	67957	119	594.686	250.754	1.1858	0
1	40	2015-06-28	13:08:19	1135	99	547.926	249.365	1.09864	1
1	41	2015-06-28	13:28:32	1195	115	633.76	257.515	1.23053	1
1	42	2015-06-28	13:50:26	607	87	532.934	246.452	1.08121	1
1	43	2015-06-28	14:01:22	843	91	552.272	259.463	1.06426	1
1	44	2015-06-28	14:16:23	768	99	559.707	260.518	1.07422	1
1	45	2015-06-28	14:29:34	740	112	550.424	254.56	1.08113	1
1	46	2015-06-28	14:42:28	957	104	545.458	261.178	1.04423	1
1	47	2015-06-28	14:58:56	893	121	561.767	255.487	1.0994	1
1	48	2015-06-28	15:14:21	812	110	571.975	263.347	1.08597	1
1	49	2015-06-28	15:28:48	2110	98	579.054	271.932	1.0647	1
1	50	2015-06-28	16:04:47	1187	125	564.686	259.781	1.08685	1
1	51	2015-06-28	16:25:21	1349	88	548.336	255.937	1.07123	1
1	52	2015-06-29	10:12:14	1512	84	480.712	224.878	1.06883	1
1	53	2015-06-29	10:38:41	1004	29	148.612	64.6919	1.14861	1
1	54	2015-06-29	10:55:54	1149	35	470.662	231.075	1.01842	1
1	55	2015-06-29	11:16:03	1025	79	573.271	270.275	1.06053	1
1	56	2015-06-29	11:33:40	872	77	496.297	240.036	1.0338	1
1	57	2015-06-29	11:48:32	1108	87	520.468	238.115	1.09289	1
1	58	2015-06-29	12:07:47	1163	80	528.107	256.09	1.0311	1
1	59	2015-06-29	12:27:39	881	72	553.548	257.961	1.07293	1
1	60	2015-06-29	12:43:35	1106	87	568.077	267.755	1.06082	1
1	61	2015-06-29	13:02:27	12527	81	582.89	272.189	1.07074	1
1	62	2015-06-29	16:36:11	1361	49	502.743	242.167	1.03801	1
1	63	2015-06-29	16:59:33	1063	67	543.463	258.864	1.04971	1
1	64	2015-06-29	17:20:50	59788	123	701.257	260.194	1.34757	0
1	65	2015-06-30	10:00:55	1352	83	572.745	244.186	1.17276	0
1	66	2015-06-30	10:24:50	1326	57	505.837	246.191	1.02733	1
1	67	2015-06-30	10:47:16	1162	44	521.034	254.861	1.02219	1
1	68	2015-06-30	11:07:24	4948	61	755.944	305.381	1.2377	0
1	69	2015-06-30	12:30:33	1182	78	564.333	258.179	1.09291	1
1	70	2015-06-30	12:51:07	1099	50	535.052	256.434	1.04326	1
1	71	2015-06-30	13:09:35	1056	104	585.878	252.868	1.15847	1
1	72	2015-06-30	13:28:09	957	58	475.173	216.944	1.09515	1
1	73	2015-06-30	13:45:36	946	58	550.029	249.509	1.10222	1
1	74	2015-06-30	14:03:38	1079	24	121.558	58.6094	1.03702	1
1	75	2015-06-30	14:29:26	1284	59	538.334	249.893	1.07713	1
1	76	2015-06-30	14:52:03	903	75	535.63	254.842	1.0509	1
1	77	2015-06-30	15:07:52	975	49	496.02	243.398	1.01895	1
1	78	2015-06-30	15:26:06	4454	43	363.696	167.975	1.08259	1
1	79	2015-06-30	16:41:10	944	76	523.438	250.77	1.04366	1
1	80	2015-06-30	16:57:41	1193	29	483.08	237.193	1.01833	1
1	81	2015-06-30	17:18:29	971	49	532.835	255.243	1.04378	1
1	82	2015-06-30	17:35:18	1063	45	383.059	180.893	1.0588	1
1	83	2015-07-03	14:53:25	876	123	776.186	291.063	1.33336	0
1	84	2015-07-04	09:35:50	855	122	587.075	245.1	1.19762	0
1	85	2015-07-04	09:51:06	686	137	698.95	276.644	1.26327	0
1	86	2015-07-04	10:12:57	1048	83	356.287	132.91	1.34033	0
1	87	2015-07-04	10:32:01	1100	69	248.888	98.3818	1.26491	1
1	88	2015-07-04	10:51:16	978	77	371.163	148.015	1.2538	1
1	89	2015-07-04	11:08:00	773	76	296.506	134.498	1.10227	1
1	90	2015-07-04	11:21:22	1060	81	326.986	142.59	1.14659	1
1	91	2015-07-04	11:39:48	993	70	316.393	143.319	1.10381	1
1	92	2015-07-04	11:58:23	961	55	235.995	109.583	1.07678	1
1	93	2015-07-04	12:15:51	1376	63	227.337	105.888	1.07348	1
1	94	2015-07-04	12:40:28	1200	53	207.735	96.298	1.0786	1
1	95	2015-07-04	13:01:31	2567	44	317.067	143.937	1.10141	1
1	96	2015-07-04	13:46:05	1043	66	253.896	105.436	1.20404	1
1	97	2015-07-04	14:04:47	816	51	231.343	105.583	1.09555	1
1	98	2015-07-04	14:19:36	1382	46	256.926	120.756	1.06382	1
1	99	2015-07-04	14:43:10	875	52	215.568	105.103	1.02551	1
1	100	2015-07-04	14:59:09	1048	51	246.995	116.916	1.05629	1
1	101	2015-07-04	15:17:01	1054	67	275.707	114.146	1.20769	1
1	102	2015-07-04	15:35:59	1103	75	272.068	122.458	1.11086	1
1	103	2015-07-04	15:55:08	1104	53	232.41	108.244	1.07355	1
1	104	2015-07-04	16:14:21	991	50	219.095	104.185	1.05147	1
1	105	2015-07-04	16:31:27	1023	55	264.679	120.137	1.10157	1
1	106	2015-07-04	16:49:13	1002	46	285.156	137.751	1.03504	1
1	107	2015-07-04	17:06:27	904	61	282.634	136.457	1.03561	1
1	108	2015-07-04	17:22:15	1874	61	264.273	125.996	1.04873	1
1	109	2015-07-05	10:19:10	1015	37	184.621	88.9064	1.03829	1
1	110	2015-07-05	10:37:29	938	59	244.601	102.123	1.19757	1
1	111	2015-07-05	10:54:45	778	38	260.681	118.321	1.10158	1
1	112	2015-07-05	11:13:23	505	50	251.425	115.08	1.09239	1
1	113	2015-07-05	11:23:15	801	46	293.959	137.974	1.06527	1
1	114	2015-07-05	11:38:17	1580	44	236.405	113.102	1.0451	1
1	115	2015-07-05	12:05:06	862	20	73.2733	35.136	1.04271	1
1	116	2015-07-05	12:20:17	753	42	232.802	113.022	1.0299	1
1	117	2015-07-05	12:33:33	831	57	244.524	115.961	1.05434	1
1	118	2015-07-05	12:47:41	744	61	233.753	103.708	1.12698	1
1	119	2015-07-05	13:00:16	881	56	227.376	105.141	1.0813	1
1	120	2015-07-05	13:15:08	872	56	230.848	109.198	1.05701	1
1	121	2015-07-05	13:30:00	1640	64	221.659	96.8016	1.14492	1
1	122	2015-07-05	13:57:32	1048	43	187.578	74.8877	1.25239	1
1	123	2015-07-05	14:15:11	1031	79	283.116	124.385	1.13807	1
1	124	2015-07-05	14:32:36	1019	61	200.5	90.0382	1.11341	1
1	125	2015-07-05	14:49:46	2282	65	256.546	114.881	1.11657	1
1	126	2015-07-05	15:27:59	1013	67	288.527	132.979	1.08486	1
1	127	2015-07-05	15:45:16	1198	77	296.138	134.523	1.1007	1
1	128	2015-07-05	16:06:09	1019	78	258.399	109.852	1.17612	1
1	129	2015-07-05	16:23:54	1251	58	338.769	157.213	1.07742	1
1	130	2015-07-05	16:45:03	1132	84	300.407	129.248	1.16213	1
1	131	2015-07-05	17:04:35	877	84	257.876	113.679	1.13423	1
1	132	2015-07-05	17:21:31	1111	85	252.992	111.863	1.13081	1
1	133	2015-07-05	17:40:49	868	79	281.195	129.005	1.08986	1
1	134	2015-07-05	17:55:49	775	81	286.16	126.459	1.13144	1
1	135	2015-07-05	18:09:33	906	93	431.302	145.809	1.47899	1
1	136	2015-07-06	09:21:39	1071	93	337.589	112.36	1.50227	0
1	137	2015-07-06	09:40:17	1211	67	274.072	119.622	1.14558	1
1	138	2015-07-06	10:00:42	793	92	286.106	129.718	1.1028	1
1	139	2015-07-06	10:14:12	1461	109	442.46	116.011	1.90698	0
1	140	2015-07-06	10:38:36	846	87	287.64	116.673	1.23267	1
1	141	2015-07-06	10:52:56	956	76	287.103	119.72	1.19906	1
1	142	2015-07-06	11:09:04	938	72	286.598	128.78	1.11274	1
1	143	2015-07-06	11:25:02	1031	60	217.305	100.044	1.08605	1
1	144	2015-07-06	11:42:34	2152	93	283.842	119.265	1.18996	1
1	145	2015-07-06	12:18:58	1130	81	303.634	127.229	1.19325	1
1	146	2015-07-06	12:38:11	1641	67	260.445	122.697	1.06133	1
1	147	2015-07-06	13:06:39	2933	70	284.047	133.598	1.06307	1
1	148	2015-07-06	13:56:09	1293	53	260.302	124.195	1.04796	1
1	149	2015-07-06	14:18:25	996	56	269.388	131.149	1.02703	1
1	150	2015-07-06	14:35:27	3177	77	311.656	133.244	1.1695	1
1	151	2015-07-06	15:28:53	3570	51	257.662	124.534	1.03451	1
1	152	2015-07-06	16:29:01	988	49	256.01	124.108	1.0314	1
1	153	2015-07-06	16:45:52	1342	55	263.706	127.531	1.03389	1
1	154	2015-07-06	17:08:40	1328	47	262.27	127.921	1.02513	1
1	155	2015-07-06	17:31:28	1263	41	250.428	121.653	1.02927	1
1	156	2015-07-06	17:53:09	15	15	81.9239	81.1154	0.504983	1
2	1	2015-07-11	10:25:20	10215	913	4545.44	370.899	6.12759	0
2	2	2015-07-11	13:18:59	2191	312	1303.82	158.571	4.11117	0
2	3	2015-07-11	14:15:39	4504	197	1259.64	197.039	3.19641	0
2	4	2015-07-11	15:31:15	1583	272	980.034	271.011	1.80811	0
2	5	2015-07-11	15:58:39	10054	155	787.528	258.896	1.52094	1
2	6	2015-07-12	10:17:26	1345	136	429.5	72.4036	2.96601	0
2	7	2015-07-12	10:42:34	1799	68	163.511	55.3518	1.47701	1
2	8	2015-07-12	11:42:55	1684	36	154.981	72.9591	1.06211	1
2	9	2015-07-12	12:11:48	5202	284	1791.86	360.779	2.48332	0
2	10	2015-07-12	14:30:30	2237	300	1517.35	194.992	3.8908	0
2	11	2015-07-12	20:22:26	768	202	1210.04	250.614	2.41415	0
2	12	2015-07-13	10:51:10	956	87	444.233	119.709	1.85547	1
2	13	2015-07-13	11:12:26	1925	44	385.17	126.748	1.51943	1
2	14	2015-07-13	12:26:04	1708	319	1511.55	228.279	3.31076	0
2	15	2015-07-13	13:44:09	2500	44	406.904	192.061	1.05931	1
2	16	2015-07-13	14:37:32	72761	112	1502.16	295.789	2.53924	0
2	17	2015-07-14	10:58:51	7011	264	1881.72	202.417	4.64812	0
2	18	2015-07-14	13:19:29	3031	70	494.661	202.519	1.22127	0
2	19	2015-07-14	14:20:50	3947	455	3283.93	412.516	3.98036	0
2	20	2015-07-14	15:46:49	2854	134	924.511	260.389	1.77525	0
2	21	2015-07-14	17:05:42	3581	89	746.387	278.495	1.34004	0
2	22	2015-07-14	18:10:58	1078	143	754.005	223.832	1.68431	0
2	23	2015-07-14	18:37:11	1517	173	809.07	293.814	1.37684	0
2	24	2015-07-14	19:21:13	35	35	82.0178	26.5638	1.54379	0
2	25	2015-07-15	08:44:34	14973	91	679.298	180.584	1.88083	0
2	26	2015-07-15	12:56:15	518	49	172.228	74.5014	1.15587	1
2	27	2015-07-15	13:05:14	737	170	565.469	82.8263	3.41358	0
2	28	2015-07-15	13:38:32	16605	419	3649.6	191.755	9.51632	0
2	29	2015-07-15	18:17:37	50315	120	2162.32	129.155	8.371	0
2	30	2015-07-16	08:21:15	17539	901	6112.3	370.494	8.24886	0
2	31	2015-07-16	13:16:23	2522	331	1516.27	569.865	1.33037	0
3	1	2015-07-23	10:12:32	15301	1964	9685.31	361.902	13.3811	0
3	2	2015-07-23	14:29:24	2855	939	2159.82	61.8998	17.4461	0
3	3	2015-07-23	16:22:03	2398	124	830.861	143.848	2.88799	0
3	4	2015-07-23	17:16:21	7538	105	348.868	78.4094	2.22466	0
3	5	2015-07-29	12:55:08	2899	463	1711.74	191.913	4.45969	0
3	6	2015-07-29	13:50:44	67964	1100	5680.34	386.974	7.33944	0
3	7	2015-07-30	08:46:11	14611	2229	6536.53	195.608	16.7083	1
3	8	2015-07-30	12:50:57	6431	909	3325.04	123.932	13.4147	1
3	9	2015-07-30	14:39:38	12805	1805	5800.37	189.444	15.309	1
3	10	2015-07-31	09:49:00	11811	207	828.348	217.841	1.90126	1
3	11	2015-07-31	13:07:36	11542	61	459.775	190.15	1.20898	1
3	12	2015-07-31	16:20:45	5293	73	448.071	192.355	1.16469	1
3	13	2015-08-01	10:29:57	6645	36	268.777	107.397	1.25132	1
3	14	2015-08-01	12:22:03	5929	50	260.974	95.9354	1.36016	1
3	15	2015-08-01	14:01:42	5984	72	452.811	204.076	1.10942	1
3	16	2015-08-01	15:42:33	6880	64	340.333	142.44	1.19466	1
3	17	2015-08-02	10:14:11	6525	97	457.902	131.798	1.73714	0
3	18	2015-08-02	12:03:40	6453	65	278.014	124.902	1.11293	1
3	19	2015-08-02	13:51:45	6042	123	391.944	133.94	1.46313	0
3	20	2015-08-02	15:33:08	6112	52	285.741	135.707	1.05279	1
3	21	2015-08-05	10:40:33	8473	165	691.163	161.248	2.14317	1
3	22	2015-08-05	13:02:26	15720	96	321.593	141.74	1.13445	1
3	23	2015-08-06	11:11:09	6466	107	459.367	168.131	1.3661	0
3	24	2015-08-06	13:00:35	6306	97	401.969	163.941	1.22595	1
3	25	2015-08-06	14:46:51	6917	73	417.676	167.532	1.24656	1
3	26	2015-08-06	16:42:55	9127	87	350.864	157.406	1.11452	1
4	1	2015-08-21	09:53:09	4984	455	1820.26	24.8441	36.6337	0
4	2	2015-08-21	11:59:13	606	233	1033.77	170.084	3.039	0
4	3	2015-08-21	12:51:07	2958	141	572.249	124.474	2.29867	0
4	4	2015-08-21	17:00:22	615	233	1169.85	347.97	1.68097	0
4	5	2015-08-22	11:28:00	514	234	916.431	238.861	1.91833	0
4	6	2015-08-22	11:47:10	1372	110	665.566	261.518	1.27251	0
4	7	2015-08-22	12:14:54	2425	96	534.449	212.019	1.26038	0
4	8	2015-08-22	13:13:11	2845	143	1520.45	387.57	1.96151	1
4	9	2015-08-22	14:11:40	1995	113	873.035	395.197	1.10456	1
4	10	2015-08-22	14:47:38	1636	91	593.098	275.716	1.07556	1
4	11	2015-08-22	15:17:47	1343	90	674.583	314.996	1.07078	1
4	12	2015-08-22	15:44:04	1794	83	565.5	262.257	1.07814	1
4	13	2015-08-22	16:26:41	1356	91	572.015	271.068	1.05511	1
4	14	2015-08-22	17:09:21	1271	82	566.877	248.84	1.13904	1
4	15	2015-08-22	17:38:49	1379	90	547.85	261.012	1.04947	1
4	16	2015-08-28	10:37:25	1501	275	1074.28	134.439	3.99541	0
4	17	2015-08-28	11:22:06	1722	199	1257.66	575.241	1.09316	1
4	18	2015-08-28	12:28:26	2847	113	436.269	191.37	1.13986	0
4	19	2015-08-28	13:45:10	1093	165	1185.91	565.211	1.04908	1
4	20	2015-08-29	11:41:20	3872	194	720.953	213.677	1.68702	0
4	21	2015-08-29	12:46:39	3578	73	517.72	246.232	1.05129	1
4	22	2015-08-29	13:49:58	5080	65	506.432	235.826	1.07374	1
4	23	2015-08-29	15:16:09	2395	68	318.8	146.227	1.09009	1
4	24	2015-08-29	16:25:31	1782	175	1092.22	240.635	2.26946	1
4	25	2015-09-01	14:50:45	2790	363	2210.22	274.507	4.02579	0
4	26	2015-09-01	16:22:40	1297	157	623.483	244.975	1.27254	1
4	27	2015-09-02	13:49:09	1324	272	1666.45	442.672	1.88226	0
4	28	2015-09-03	10:49:57	44	44	71.7389	17.9416	1.99923	0
4	29	2015-09-03	10:51:19	1007	102	647.674	283.932	1.14054	1
4	30	2015-09-03	11:51:12	1897	115	360.121	145.234	1.23979	0
4	31	2015-09-03	13:01:32	152	35	248.277	207.801	0.597391	0
